# Supplementary material for: An international, multicenter study of intravenous bevacizumab for bleeding in hereditary hemorrhagic telangiectasia: the InHIBIT-Bleed study
Source: PubMed Central journal article supplement — Haematologica. 2020 Jul 16;106(8):2161–9. doi: 10.3324/haematol.2020.261859 (PMC8327711; doi:10.3324/haematol.2020.261859), 2020-07-16
Supplement: 2020_261859_AL_SAMKARI_SUPPL.pdf [file 2020_261859_AL_SAMKARI_SUPPL.pdf]

## An international, multicenter study of intravenous bevacizumab for bleeding in hereditary hemorrhagic telangiectasia: the InHIBIT-Bleed study

Hanny Al-Samkari,<sup>1,2</sup> Raj S. Kasthuri,<sup>3</sup> Joseph G. Parambil,<sup>4</sup> Hasan A. Albitar,<sup>5</sup> Yahya A. Almodallal,<sup>6</sup> Carolina Vázquez,<sup>7</sup> Marcelo M. Serra,<sup>7</sup> Sophie Dupuis-Girod,<sup>8</sup> Craig B. Wilsen,<sup>9</sup> Justin P. McWilliams,<sup>9</sup> Evan H. Fountain,<sup>10</sup> James R. Gossage,<sup>10</sup> Clifford R. Weiss,<sup>11</sup> Muhammad A. Latif,<sup>11</sup> Assaf Issachar,<sup>12</sup> Meir Mei-Zahav,<sup>12</sup> Mary E. Meek,<sup>13</sup> Miles Conrad,<sup>14</sup> Josanna Rodriguez-Lopez,<sup>1,15</sup> David J. Kuter<sup>1,2</sup> and Vivek N. Iyer<sup>16</sup>

<sup>1</sup>Harvard Medical School, Boston, MA, USA; <sup>2</sup>Division of Hematology, Massachusetts General Hospital, Boston, MA, USA; <sup>3</sup>Division of Hematology/Oncology, University of North Carolina at Chapel Hill, Chapel Hill, NC, USA; <sup>4</sup>Respiratory Institute, Cleveland Clinic, Cleveland, OH, USA; <sup>5</sup>Department of Internal Medicine, Mayo Clinic, Rochester, MN, USA; <sup>6</sup>Department of Pediatrics, Mayo Clinic, Rochester, MN, USA; <sup>7</sup>HHT Center Argentina, Department of Internal Medicine, Hospital Italiano de Buenos Aires, Buenos Aires, Argentina; <sup>8</sup>Centre de Référence pour la Maladie de Rendu-Osler, Hospices Civils de Lyon, Lyon, France; <sup>9</sup>Division of Interventional Radiology, Department of Radiology, David Geffen School of Medicine at UCLA, Los Angeles, CA, USA; <sup>10</sup>Division of Pulmonary, Critical Care, and Sleep Medicine, Augusta University, Augusta, GA, USA; <sup>11</sup>Russel H. Morgan Department of Radiology and Radiological Science, Division of Interventional Radiology, Johns Hopkins University School of Medicine, Baltimore, MD, USA; <sup>12</sup>Schneider Children's Medical Center of Israel, Tel Aviv University, Tel Aviv, Israel; <sup>13</sup>Department of Radiology, University of Arkansas for Medical Sciences, Little Rock, AR, USA; <sup>14</sup>Department of Radiology, University of California San Francisco Medical Center, San Francisco, CA, USA; <sup>15</sup>Division of Pulmonary and Critical Care Medicine, Massachusetts General Hospital, Boston, MA, USA and <sup>16</sup>Division of Pulmonary and Critical Care Medicine, Mayo Clinic, Rochester, MN, USA

©2021 Ferrata Storti Foundation. This is an open-access paper. doi:10.3324/haematol.2020.261859

Received: June 4 2020.

Accepted: June 30, 2020.

Pre-published: July 16, 2020.

Correspondence: *HANNY AL-SAMKARI* - hal-samkari@mgh.harvard.edu

**An International, Multicenter Study of Intravenous Bevacizumab for Bleeding in Hereditary Hemorrhagic Telangiectasia: The InHIBIT-Bleed Study**

**Supplemental Material**

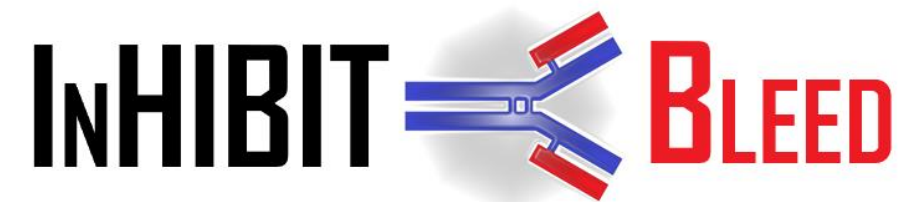

The International HHT Intravenous Bevacizumab Investigative Team Study of Bleeding

## Table of Contents

|                                                                                                                                                                      |              |
|----------------------------------------------------------------------------------------------------------------------------------------------------------------------|--------------|
| <b>Supplemental Methods</b> .....                                                                                                                                    | <b>3</b>     |
| <b>Supplemental Tables</b> .....                                                                                                                                     | <b>4-10</b>  |
| Supplemental Table 1. General criteria considered by centers in determining whether to offer systemic bevacizumab for the treatment of HHT-associated bleeding ..... | 4            |
| Supplemental Table 2. Results of mixed linear models of outcome measures .....                                                                                       | 5            |
| Supplemental Table 3. Subgroup analysis by genotype .....                                                                                                            | 6            |
| Supplemental Table 4. Subgroup analysis by maintenance dosing strategy .....                                                                                         | 7            |
| Supplemental Table 5. Bevacizumab-treated patients receiving concurrent treatments for HHT-associated bleeding versus those receiving no concurrent treatments.....  | 8            |
| Supplemental Table 6. Venous thromboembolic events in patients treated with bevacizumab .....                                                                        | 9            |
| Supplemental Table 7. Bevacizumab TEAEs prompting discontinuation .....                                                                                              | 10           |
| <b>Supplemental Figures</b> .....                                                                                                                                    | <b>11-14</b> |
| Supplemental Figure 1. Estimated outcome measures on treatment using mixed effects linear regression models .....                                                    | 11-14        |
| <b>Additional Information</b> .....                                                                                                                                  | <b>15</b>    |
| <b>Supplemental References</b> .....                                                                                                                                 | <b>15</b>    |

## Supplemental Methods

*Additional Data Collection Information.* Patients were excluded from the study if inadequate chart data was available to assess one or more effectiveness measures or safety (which required complete and continuous follow-up data during bevacizumab treatment such that all adverse events were captured). A standard data collection form was developed and used by all the participating sites. The following data was collected retrospectively from the electronic medical record: demographics, baseline HHT characteristics, local hemostatic procedures performed, epistaxis severity score (ESS) measurements, bevacizumab dosing, treatment-emergent adverse events (TEAEs), treatment discontinuation, hematologic parameters and support [including hemoglobin (Hgb) values, RBC transfusions, and iron infusions], administration of antifibrinolytic agents or erythropoiesis-stimulating agents, and total duration of follow-up.

*Additional Effectiveness Measures Details.* Hemoglobin. The threshold for definition of anemia (Hgb <11 g/dL) was selected for clinical relevance and because of its use in prior studies of non-HHT anemia-directed treatment.<sup>1</sup>

*Epistaxis Severity Score Background.* The ESS is a well-validated continuous 10-point clinical score to longitudinally assess the severity of nosebleeds in patients with HHT.<sup>2</sup> A score of 0.0-1.0 signifies minimal or no epistaxis, 1.1-4.0 signifies mild epistaxis, 4.1-7.0 signifies moderate epistaxis, and 7.1-10.0 signifies severe epistaxis occurring over the time since the patient's last clinic visit. The minimal clinically-important difference of the ESS is a change of 0.71.<sup>3</sup>

*Additional Statistical Analysis Details.* For genotype subgroup analysis, the treatment effect (difference between baseline/pretreatment values and on-treatment values) for each effectiveness measure was compared between subgroups using the two-sample t-test (Hgb and ESS) or the Mann-Whitney U test (RBC transfusions and iron infusions). For maintenance dosing subgroup analysis, results in each group were compared using the two-sample t-test (Hgb and ESS) or the Mann-Whitney U test (RBC transfusions, iron infusions). Maintenance dosing subgroup analysis compared the first 6 months of treatment (most reflective of induction treatment) and the second 6 months of treatment (entirely reflective of maintenance strategy) between patients receiving continuous vs. intermittent maintenance.

Missing data were not imputed. For comparisons of means or medians, if the baseline or at least one on-treatment value for a given patient was not available, that patient was omitted from analysis of that particular outcome.

Statistical analysis was performed and graphs for figures were prepared using Stata version 14.2 (StataCorp LLC, College Station, TX), GraphPad Prism 7 (GraphPad, Inc., San Diego, CA), and Microsoft Excel 360 (Microsoft Corp., Seattle, WA).

**Supplemental Table 1.** General criteria considered by centers in determining whether to offer systemic bevacizumab for the treatment of HHT-associated bleeding. Given the heterogeneity of bleeding manifestations and severity in HHT, criteria are not absolute and ultimately the decision to begin bevacizumab was a shared one between patient and provider with a detailed discussion of the possible risks and benefits.

| <b>General Criteria for Systemic Bevacizumab*</b>                                                                                                                                                                                                                                                                                                                                                                                                             |
|---------------------------------------------------------------------------------------------------------------------------------------------------------------------------------------------------------------------------------------------------------------------------------------------------------------------------------------------------------------------------------------------------------------------------------------------------------------|
| <b>Epistaxis</b> <ul style="list-style-type: none"><li>• Epistaxis severity score &gt; 7 (severe range) on a consistent basis despite adequate local nasal therapy +/- systemic antifibrinolytic treatment</li><li>• Need for frequent local nasal procedures to maintain epistaxis control</li><li>• Significant quality of life impairment (social isolation, work restrictions or psychological distress) regardless of epistaxis severity score</li></ul> |
| <b>Gastrointestinal bleeding</b> <ul style="list-style-type: none"><li>• Hospitalization for GI bleeding</li><li>• Need for frequent endoscopic procedural treatments</li><li>• Persistent anemia requiring IV iron infusions and/or blood transfusions</li></ul>                                                                                                                                                                                             |
| <b>Iron deficiency anemia (from either epistaxis and/or GI bleeding)</b> <ul style="list-style-type: none"><li>• Need for regular IV iron infusions and/or blood transfusions to maintain target hemoglobin<sup>†</sup></li><li>• Inability to maintain target hemoglobin<sup>†</sup> despite regular IV iron infusions and/or blood transfusions</li></ul>                                                                                                   |

\*Patients would typically be eligible to receive systemic bevacizumab if one or more of the criteria below were met.

<sup>†</sup>The target hemoglobin in HHT patients is generally a normal hemoglobin for gender, unless there is a known condition resulting in reduced baseline hemoglobin (e.g. thalassemia trait).

**Supplemental Table 2.** Results of mixed linear models of outcome measures. Estimated treatment effect of bevacizumab on hemoglobin, epistaxis severity score, RBC transfusions, and iron infusions over the first year of treatment.

| <b>Outcome</b>                                                                                                                 | <b>3 months</b>                        | <b>6 months</b>                        | <b>9 months</b>                        | <b>12 months</b>                       |
|--------------------------------------------------------------------------------------------------------------------------------|----------------------------------------|----------------------------------------|----------------------------------------|----------------------------------------|
| <b>Hemoglobin (g/dL), estimated change of mean from baseline (95% CI) in patients with baseline anemia (Hgb&lt;11) (N=185)</b> | +3.0 (2.7, 3.3; <i>P</i> <0.0001)      | +3.4 (3.1, 3.7; <i>P</i> <0.0001)      | +3.3 (3.0, 3.6; <i>P</i> <0.0001)      | +3.4 (3.1, 3.7; <i>P</i> <0.0001)      |
| <b>Epistaxis severity score, estimated change of mean from baseline (95% CI) in patients treated for epistaxis (N=146)</b>     | -2.96 (-3.26, -2.66; <i>P</i> <0.0001) | -3.73 (-4.05, -3.43; <i>P</i> <0.0001) | -3.69 (-4.03, -3.35; <i>P</i> <0.0001) | -3.60 (-3.94, -3.26; <i>P</i> <0.0001) |
| <b>Outcome</b>                                                                                                                 | <b>First 6 months on treatment</b>     |                                        | <b>Second 6 months on treatment</b>    |                                        |
| <b>RBC transfusions, units, estimated change of mean from pretreatment* (95% CI) (N=191)</b>                                   | -7.8 (-9.3, -6.3; <i>P</i> <0.0001)    |                                        | -8.5 (-10.1, -7.0; <i>P</i> <0.0001)   |                                        |
| <b>Iron infusions, estimated change of mean from pretreatment* (95% CI) (N=183)</b>                                            | -6.4 (-7.5, -5.4; <i>P</i> <0.0001)    |                                        | -7.6 (-8.7, -6.5; <i>P</i> <0.00001)   |                                        |

\*Total number of RBC transfusions (in units) or iron infusion events in the 6 months prior to initiation of bevacizumab.

**Supplemental Table 3.** Subgroup analysis by genotype. PreTx, pretreatment, Tx, treatment.

| <b>Outcome</b>                                                                | <b>Baseline/PreTx<br/>(ENG)</b> | <b>Baseline/PreTx<br/>(ACVRL1)</b> | <b>Mean* or<br/>Median†<br/>Difference<br/>(95% CI)</b> | <b>Change w/Tx<br/>(ENG)</b> | <b>Change w/Tx<br/>(ACVRL1)</b> | <b>Mean* or<br/>Median†<br/>Difference<br/>(95% CI)</b> |
|-------------------------------------------------------------------------------|---------------------------------|------------------------------------|---------------------------------------------------------|------------------------------|---------------------------------|---------------------------------------------------------|
| <b>Hemoglobin (g/dL), mean<br/>(95% CI), baseline anemia<br/>(Hgb&lt;11)</b>  | 8.7 (8.3, 9.0)                  | 8.7 (8.4, 9.0)                     | 0.0 (-0.5, 0.4)<br><i>P</i> =0.860*                     | +3.4 (+2.8, +3.9)            | +3.0 (+2.6, +3.4)               | -0.4 (-1.0,<br>0.3) <i>P</i> =0.325*                    |
| <b>Epistaxis severity score,<br/>mean (95% CI), treated for<br/>epistaxis</b> | 6.43 (5.85, 7.00)               | 6.94 (6.62, 7.26)                  | 0.52 (-0.08,<br>1.11)<br><i>P</i> =0.090*               | -3.33 (-3.99, -2.67)         | -3.41 (-3.89, -2.94)            | -0.09 (-0.88,<br>0.71)<br><i>P</i> =0.831*              |
| <b>RBC transfusions, units,<br/>median (interquartile<br/>range)</b>          | 6.0 (0.0-12.25)                 | 8.0 (0.0-13.0)                     | 2.0 (-1.0 , 3.0)<br><i>P</i> =0.601†                    | -4.0 (-9.0-0.0)              | -6.0 (-11.0-0.0)                | -2.0 (-4.0,<br>0.0) <i>P</i> =0.247†                    |
| <b>Iron infusions, median<br/>(interquartile range)</b>                       | 8.0 (2.5-21.0)                  | 7.0 (1.25-22.0)                    | -1.0 (-3.0, 2.0)<br><i>P</i> =0.721†                    | -5.0 (-14.0-0.0)             | -5.0 (-16.75-0.0)               | 0.0 (-3.0, 2.0)<br><i>P</i> =0.794†                     |

\*By two-sample t-test.

†By Mann-Whitney U test.

**Supplemental Table 4.** Subgroup analysis by maintenance dosing strategy. CM, continuous maintenance; IM, intermittent maintenance.

| <b>Outcome</b>                                                        | <b>First 6 Months (CM)</b> | <b>First 6 Months (IM)</b> | <b>Mean* or Median† Difference (95% CI)</b> | <b>Second 6 Months (CM)</b> | <b>Second 6 Months (IM)</b> | <b>Mean* or Median† Difference (95% CI)</b> |
|-----------------------------------------------------------------------|----------------------------|----------------------------|---------------------------------------------|-----------------------------|-----------------------------|---------------------------------------------|
| <b>Hemoglobin (g/dL), mean (95% CI), baseline anemia (Hgb&lt;11)</b>  | 11.9 (11.6, 12.2)          | 11.5 (10.7, 12.2)          | -0.4 (-1.2, 0.3)<br><i>P</i> =0.237*        | 12.3 (11.9, 12.6)           | 10.8 (10.0, 11.6)           | -1.5 (-2.3, -0.7)<br><i>P</i> =0.0002*      |
| <b>Epistaxis severity score, mean (95% CI), treated for epistaxis</b> | 3.40 (3.04, 3.76)          | 3.78 (2.57, 4.99)          | 0.39 (-0.58, 1.35) <i>P</i> =0.432*         | 2.88 (2.51, 3.25)           | 4.96 (3.74, 6.18)           | 2.08 (1.09, 3.07)<br><i>P</i> <0.0001*      |
| <b>RBC transfusions, units, median (interquartile range)</b>          | 0.0 (0.0-2.0)              | 0.0 (0.0-0.5)              | 0.0 (0.0, 0.0)<br><i>P</i> =0.316†          | 0.0 (0.0-0.0)               | 0.0 (0.0-0.25)              | 0.0 (0.0, 0.0)<br><i>P</i> =0.172†          |
| <b>Iron infusions, median (interquartile range)</b>                   | 1.0 (0.0-6.0)              | 2.0 (0.0-3.0)              | -1.0 (0.0, 1.0)<br><i>P</i> =0.472†         | 0.0 (0.0-3.0)               | 0.0 (0.0-2.0)               | 0.0 (0.0, 0.0)<br><i>P</i> =0.520†          |

\*By two-sample t-test.

†By Mann-Whitney U test.



**Supplemental Table 5.** Bevacizumab-treated patients receiving concurrent treatments for HHT-associated bleeding (CT, N=88) versus those receiving no concurrent treatments (NCT, N=165). RBC transfusion and iron infusion numbers on treatment are for the first 6 months of bevacizumab treatment (for proper comparison with pretreatment numbers, which are for 6 months pretreatment). PreTx, pretreatment, BL, baseline.

| <b>Outcome</b>                                                        | <b>Baseline/PreTx (CT)</b> | <b>Baseline/PreTx (NCT)</b> | <b>Mean* or Median† Difference (95% CI)</b> | <b>On Treatment (CT)</b> | <b>On Treatment (NCT)</b> | <b>Mean* or Median† Difference (95% CI)</b> |
|-----------------------------------------------------------------------|----------------------------|-----------------------------|---------------------------------------------|--------------------------|---------------------------|---------------------------------------------|
| <b>Hemoglobin (g/dL), mean (95% CI), baseline anemia (Hgb&lt;11)</b>  | 8.7 (8.4, 9.0)             | 8.7 (8.4, 8.8)              | 0.1 (-0.3, 0.5)<br><i>P</i> =0.578*         | 11.4 (10.9, 11.9)        | 12.0 (11.7, 12.3)         | -0.6 (-1.2, -0.1)<br><i>P</i> =0.033*       |
| <b>Epistaxis severity score, mean (95% CI), treated for epistaxis</b> | 7.21 (6.71, 7.70)          | 6.60 (6.32, 6.88)           | 0.61 (0.08, 1.13) <i>P</i> =0.023*          | 3.93 (3.35, 4.51)        | 3.22 (2.91, 3.53)         | 0.71 (0.12, 1.31)<br><i>P</i> =0.019*       |
| <b>RBC transfusions, units, median (interquartile range)</b>          | 4.0 (0.0-14.25)            | 6.0 (0.0-12.0)              | 2.0 (-2.0, 2.0)<br><i>P</i> =0.975†         | 0.0 (0.0-3.5)            | 0.0 (0.0-1.0)             | 0.0 (0.0, 0.0)<br><i>P</i> =0.038†          |
| <b>Iron infusions, median (interquartile range)</b>                   | 4.0 (1.0-12.0)             | 6.0 (1.0-18.0)              | 2.0 (0.0, 3.0)<br><i>P</i> =0.157†          | 2.0 (0.5-6.0)            | 1.0 (0.0-3.0)             | 1.0 (0.0, 2.0)<br><i>P</i> =0.011†          |

\*By two-sample t-test.

†By Mann-Whitney U test.

**Supplemental Table 6.** Venous thromboembolic events in patients treated with bevacizumab. VTE, venous thromboembolism; DVT, deep vein thrombosis.

| Patient age, sex  | Type of VTE             | Known provoking factors  | #Bevacizumab infusions prior to VTE | Phase of treatment       | Notes                                                                                                                                                                                                                                                                                                                                                                                                |
|-------------------|-------------------------|--------------------------|-------------------------------------|--------------------------|------------------------------------------------------------------------------------------------------------------------------------------------------------------------------------------------------------------------------------------------------------------------------------------------------------------------------------------------------------------------------------------------------|
| <b>68, female</b> | Lobar pulmonary embolus | None                     | 2                                   | Induction                | Patient had prior unprovoked pulmonary embolism and known prothrombin G20210 mutation and was on chronic warfarin; recurrent pulmonary embolism occurred during warfarin interruption, and was later resumed on warfarin without increased bleeding symptoms; bevacizumab was not interrupted                                                                                                        |
| <b>70, male</b>   | Femoral vein DVT        | Hip replacement surgery  | 6                                   | Induction                | Bevacizumab held for 1 month prior to total hip replacement; during the postoperative period 6 weeks following bevacizumab interruption the patient developed femoral vein DVT (postoperative VTE prophylaxis was sequential compression device only), managed with warfarin for 3 months without increased bleeding symptoms; bevacizumab was resumed 1 month following surgery without incident    |
| <b>68, female</b> | Popliteal vein DVT      | Knee replacement surgery | 6                                   | Induction                | Bevacizumab held for 1 month prior to total knee replacement; during the postoperative period 5 weeks following bevacizumab interruption the patient developed popliteal vein DVT (postoperative VTE prophylaxis was sequential compression device only), managed with warfarin for 3 months without increased bleeding symptoms; bevacizumab was resumed 1 month following surgery without incident |
| <b>56, male</b>   | Femoral vein DVT        | None                     | 8                                   | Maintenance (continuous) | During a percutaneous lung AVM coiling procedure, patient was found to have an incidentally discovered asymptomatic femoral vein thrombus; because patient had active gastrointestinal bleeding an inferior vena cava filter was placed; bevacizumab was not interrupted                                                                                                                             |
| <b>62, male</b>   | Popliteal vein DVT      | None                     | 9                                   | Maintenance (continuous) | Treated with warfarin without increased bleeding; bevacizumab was not interrupted                                                                                                                                                                                                                                                                                                                    |

**Supplemental Table 7.** Bevacizumab TEAEs prompting discontinuation. All patients were treated with 5 mg/kg dose for each infusion.

| <b>Patient age, sex</b> | <b>Discontinuation event</b>                                                                                                         | <b># Bevacizumab infusions prior to discontinuation</b> | <b>Notes</b>                                                                                                                                                                                                   |
|-------------------------|--------------------------------------------------------------------------------------------------------------------------------------|---------------------------------------------------------|----------------------------------------------------------------------------------------------------------------------------------------------------------------------------------------------------------------|
| <b>87, female</b>       | Grade 2 myalgia<br>Grade 2 fatigue                                                                                                   | 5                                                       |                                                                                                                                                                                                                |
| <b>53, male</b>         | Grade 2 maculopapular rash                                                                                                           | 9                                                       |                                                                                                                                                                                                                |
| <b>54, female</b>       | Grade 3 hypertension                                                                                                                 | 1                                                       | Medical management of hypertension was not attempted prior to discontinuation                                                                                                                                  |
| <b>69, female</b>       | Grade 3 proteinuria                                                                                                                  | 11                                                      | Urinalysis prior to bevacizumab initiation was not done.                                                                                                                                                       |
| <b>50, female</b>       | Grade 2 arthralgia                                                                                                                   | 4                                                       |                                                                                                                                                                                                                |
| <b>74, female</b>       | Grade 2 hoarseness                                                                                                                   | 3                                                       | Otolaryngologic evaluation concluded patient had developed mild dysphonia likely unrelated to bevacizumab                                                                                                      |
| <b>76, male</b>         | Grade 3 proteinuria                                                                                                                  | 27                                                      | Pretreatment urinalysis negative; proteinuria developed after 19 months of bevacizumab treatment                                                                                                               |
| <b>73, female</b>       | Grade 3 hypertension                                                                                                                 | 3                                                       | Medical management of hypertension was done and was effective, but decision was still made to discontinue treatment due to exacerbated hypertension in setting of other cardiovascular issues                  |
| <b>60, female</b>       | Grade 1 alkaline phosphatase elevation<br>Grade 1 alanine aminotransferase elevation<br>Grade 1 aspartate aminotransferase elevation | 11                                                      | Patient had pre-existing liver AVMs and liver disease; after no improvement several months after bevacizumab discontinuation, it was concluded that liver enzyme elevation was likely unrelated to bevacizumab |
| <b>58, male</b>         | Grade 2 hoarseness                                                                                                                   | 6                                                       |                                                                                                                                                                                                                |
| <b>54, female</b>       | Grade 3 headache                                                                                                                     | 12                                                      |                                                                                                                                                                                                                |
| <b>70, male</b>         | Grade 2 fatigue                                                                                                                      | 4                                                       |                                                                                                                                                                                                                |

**Supplemental Figure 1.** Estimated outcome measures on treatment using mixed effects linear regression models. **(A)** Hemoglobin. **(B)** ESS. **(C)** RBC transfusion. **(D)** Iron infusion.

**(A)**

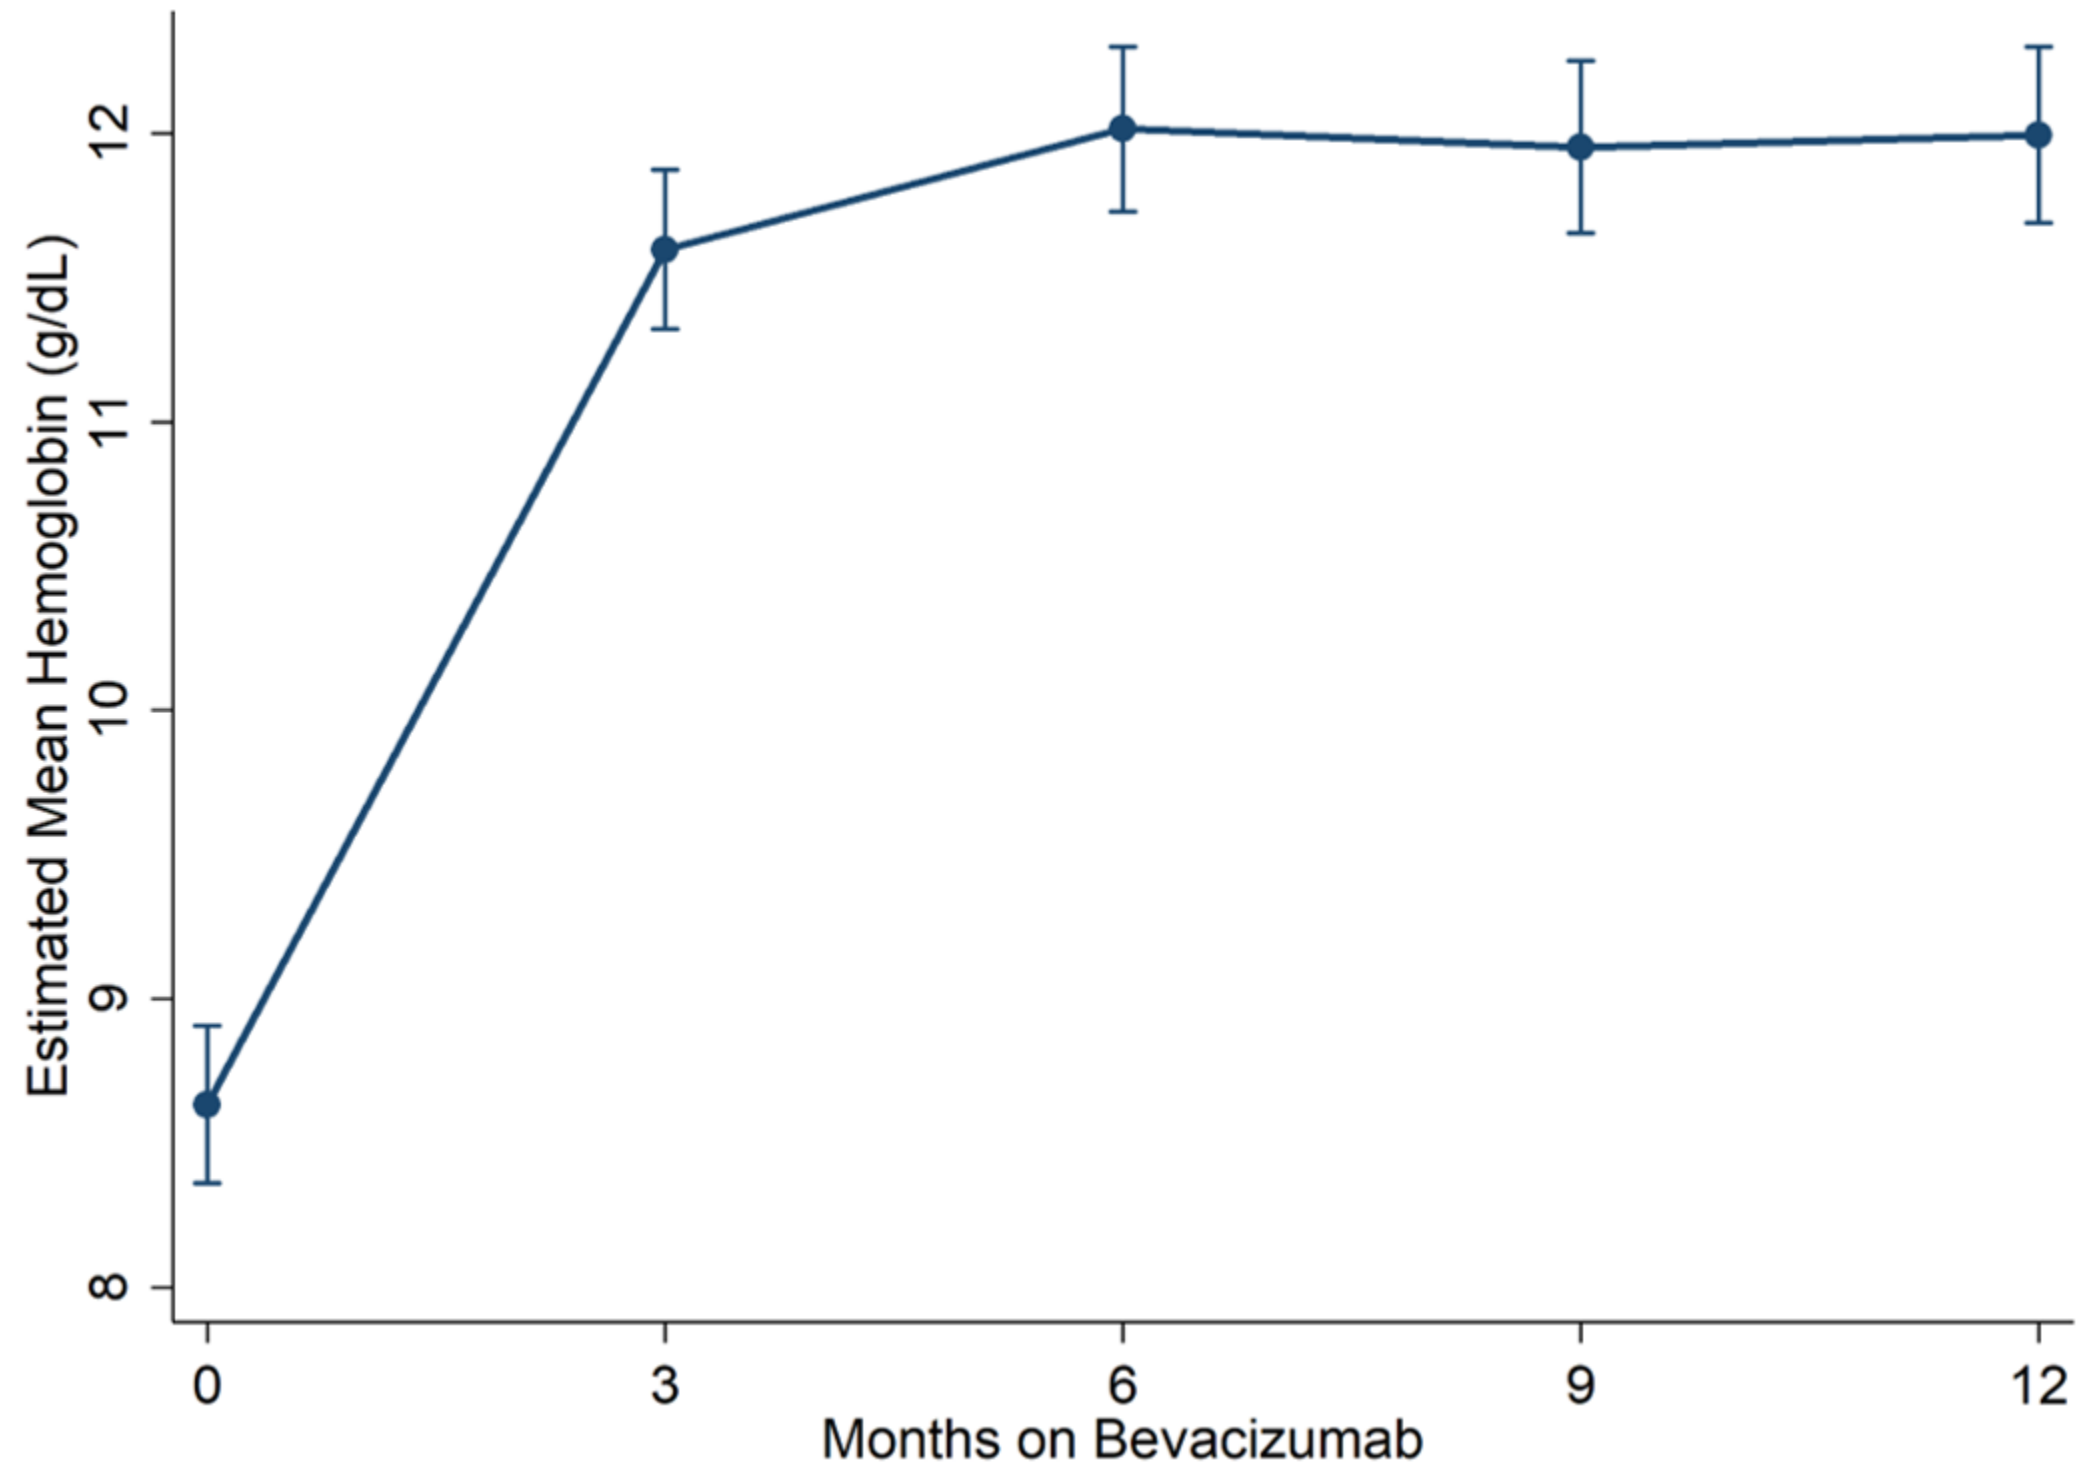

(B)

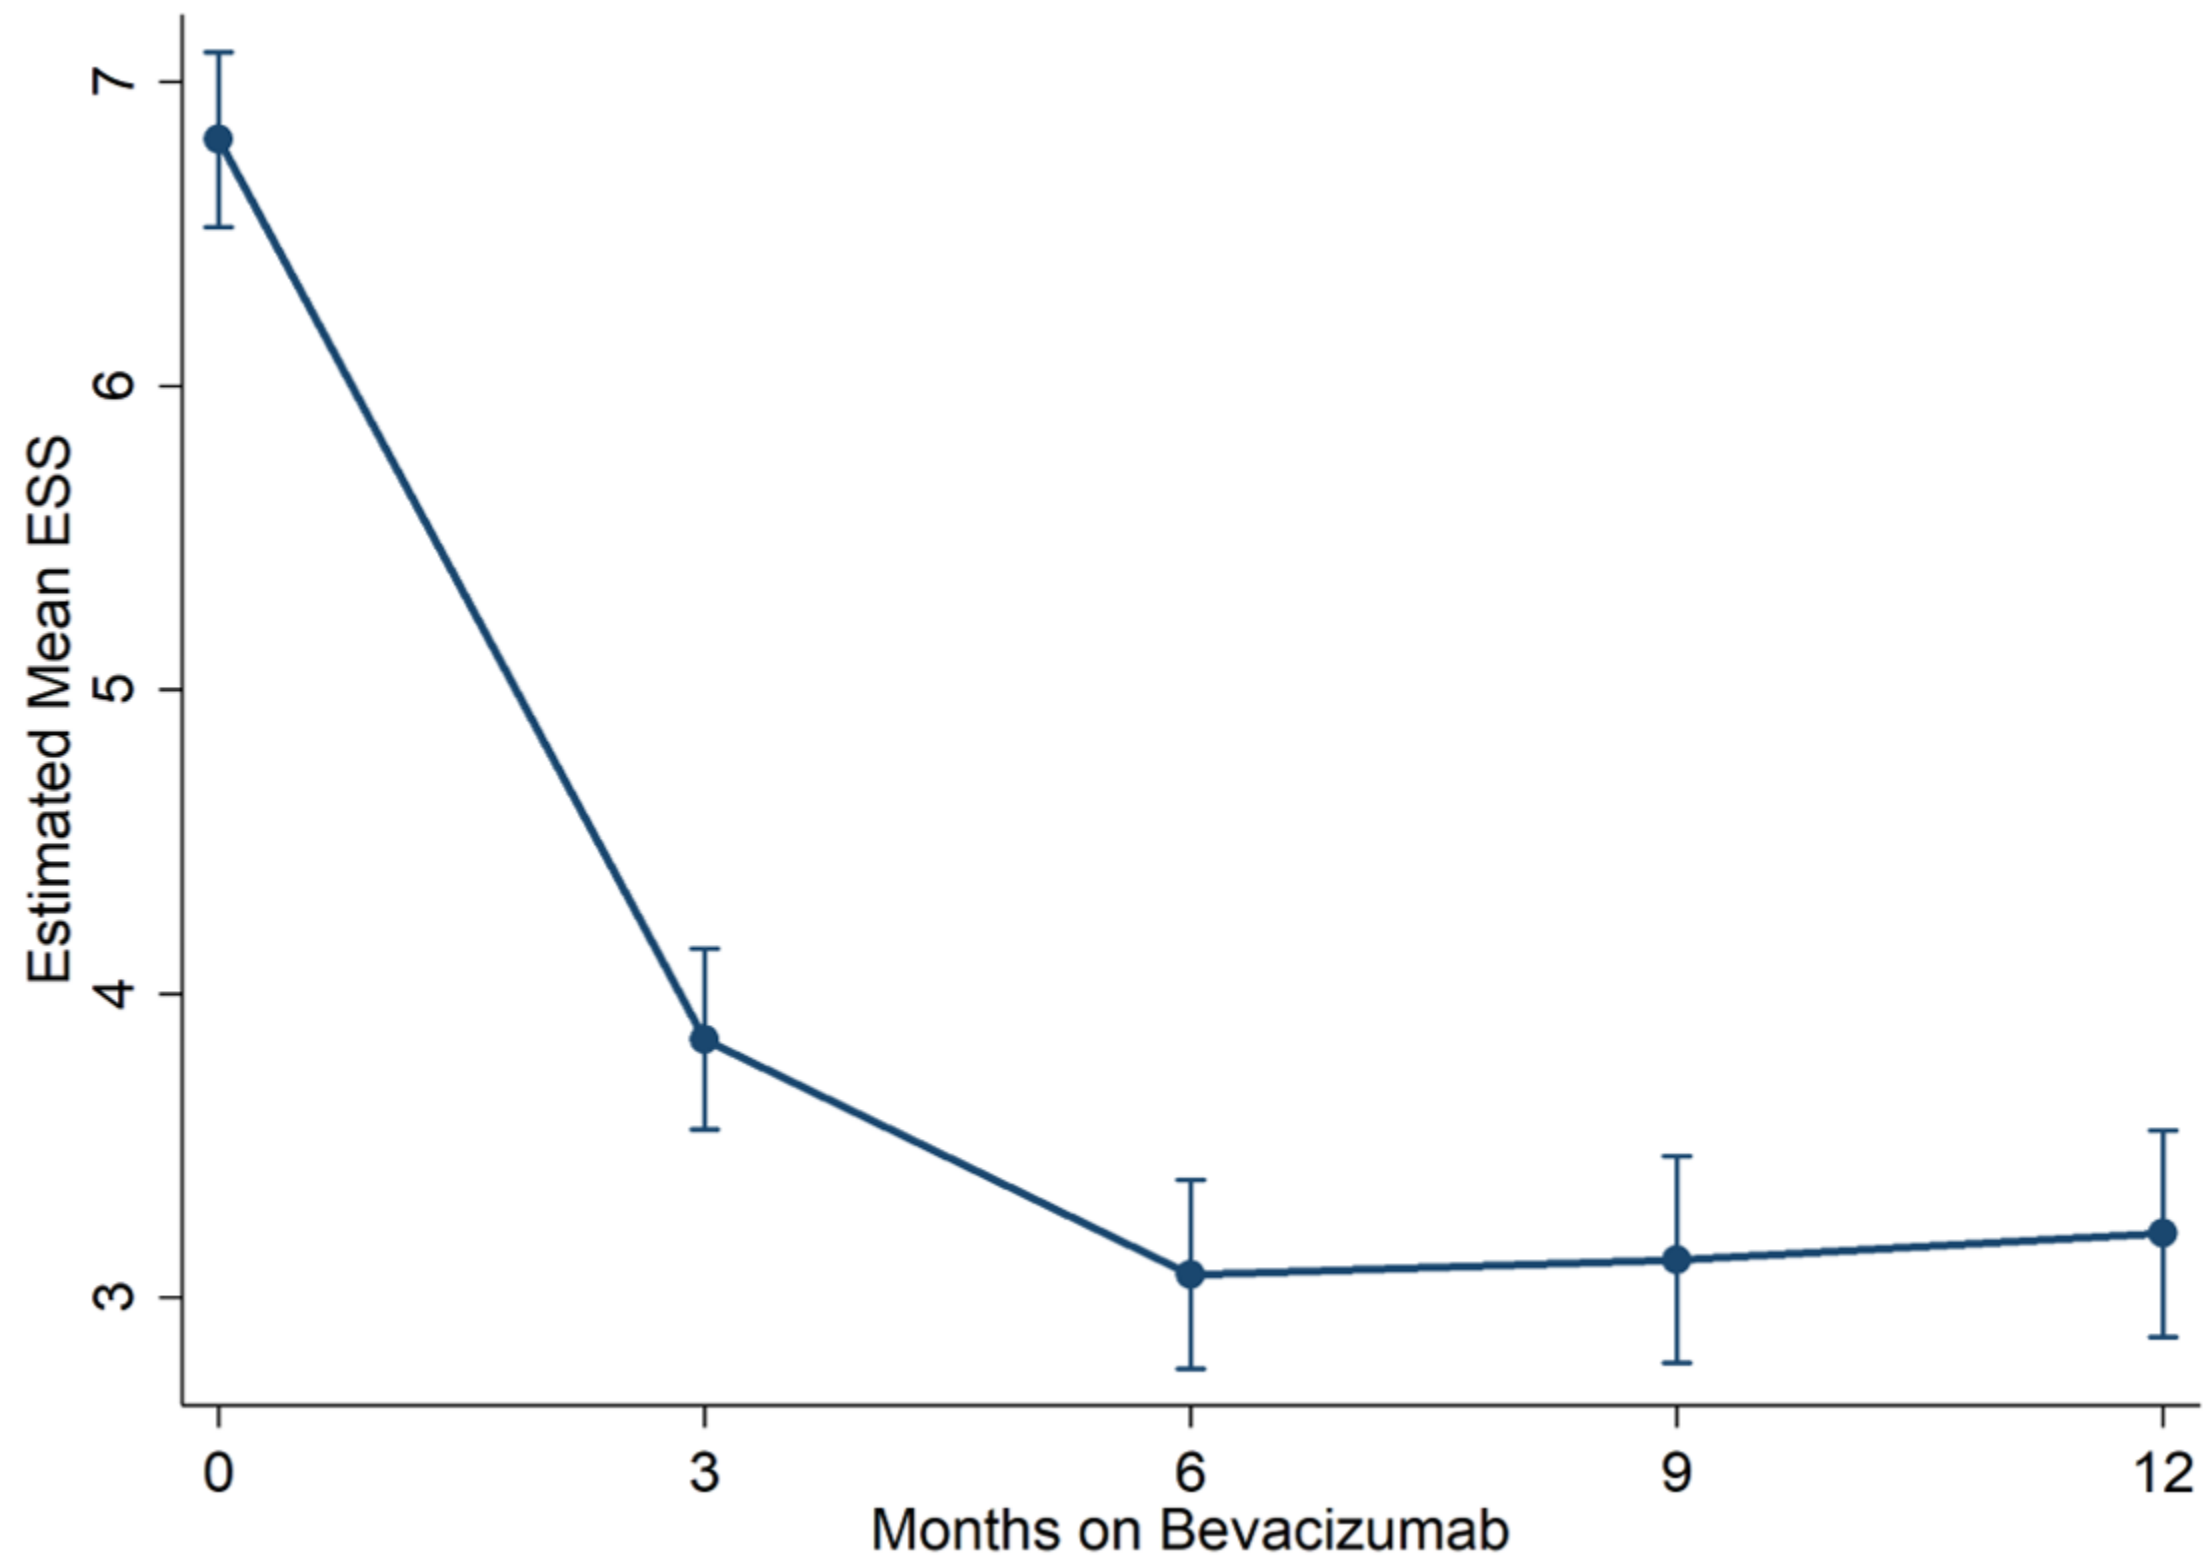

(c)

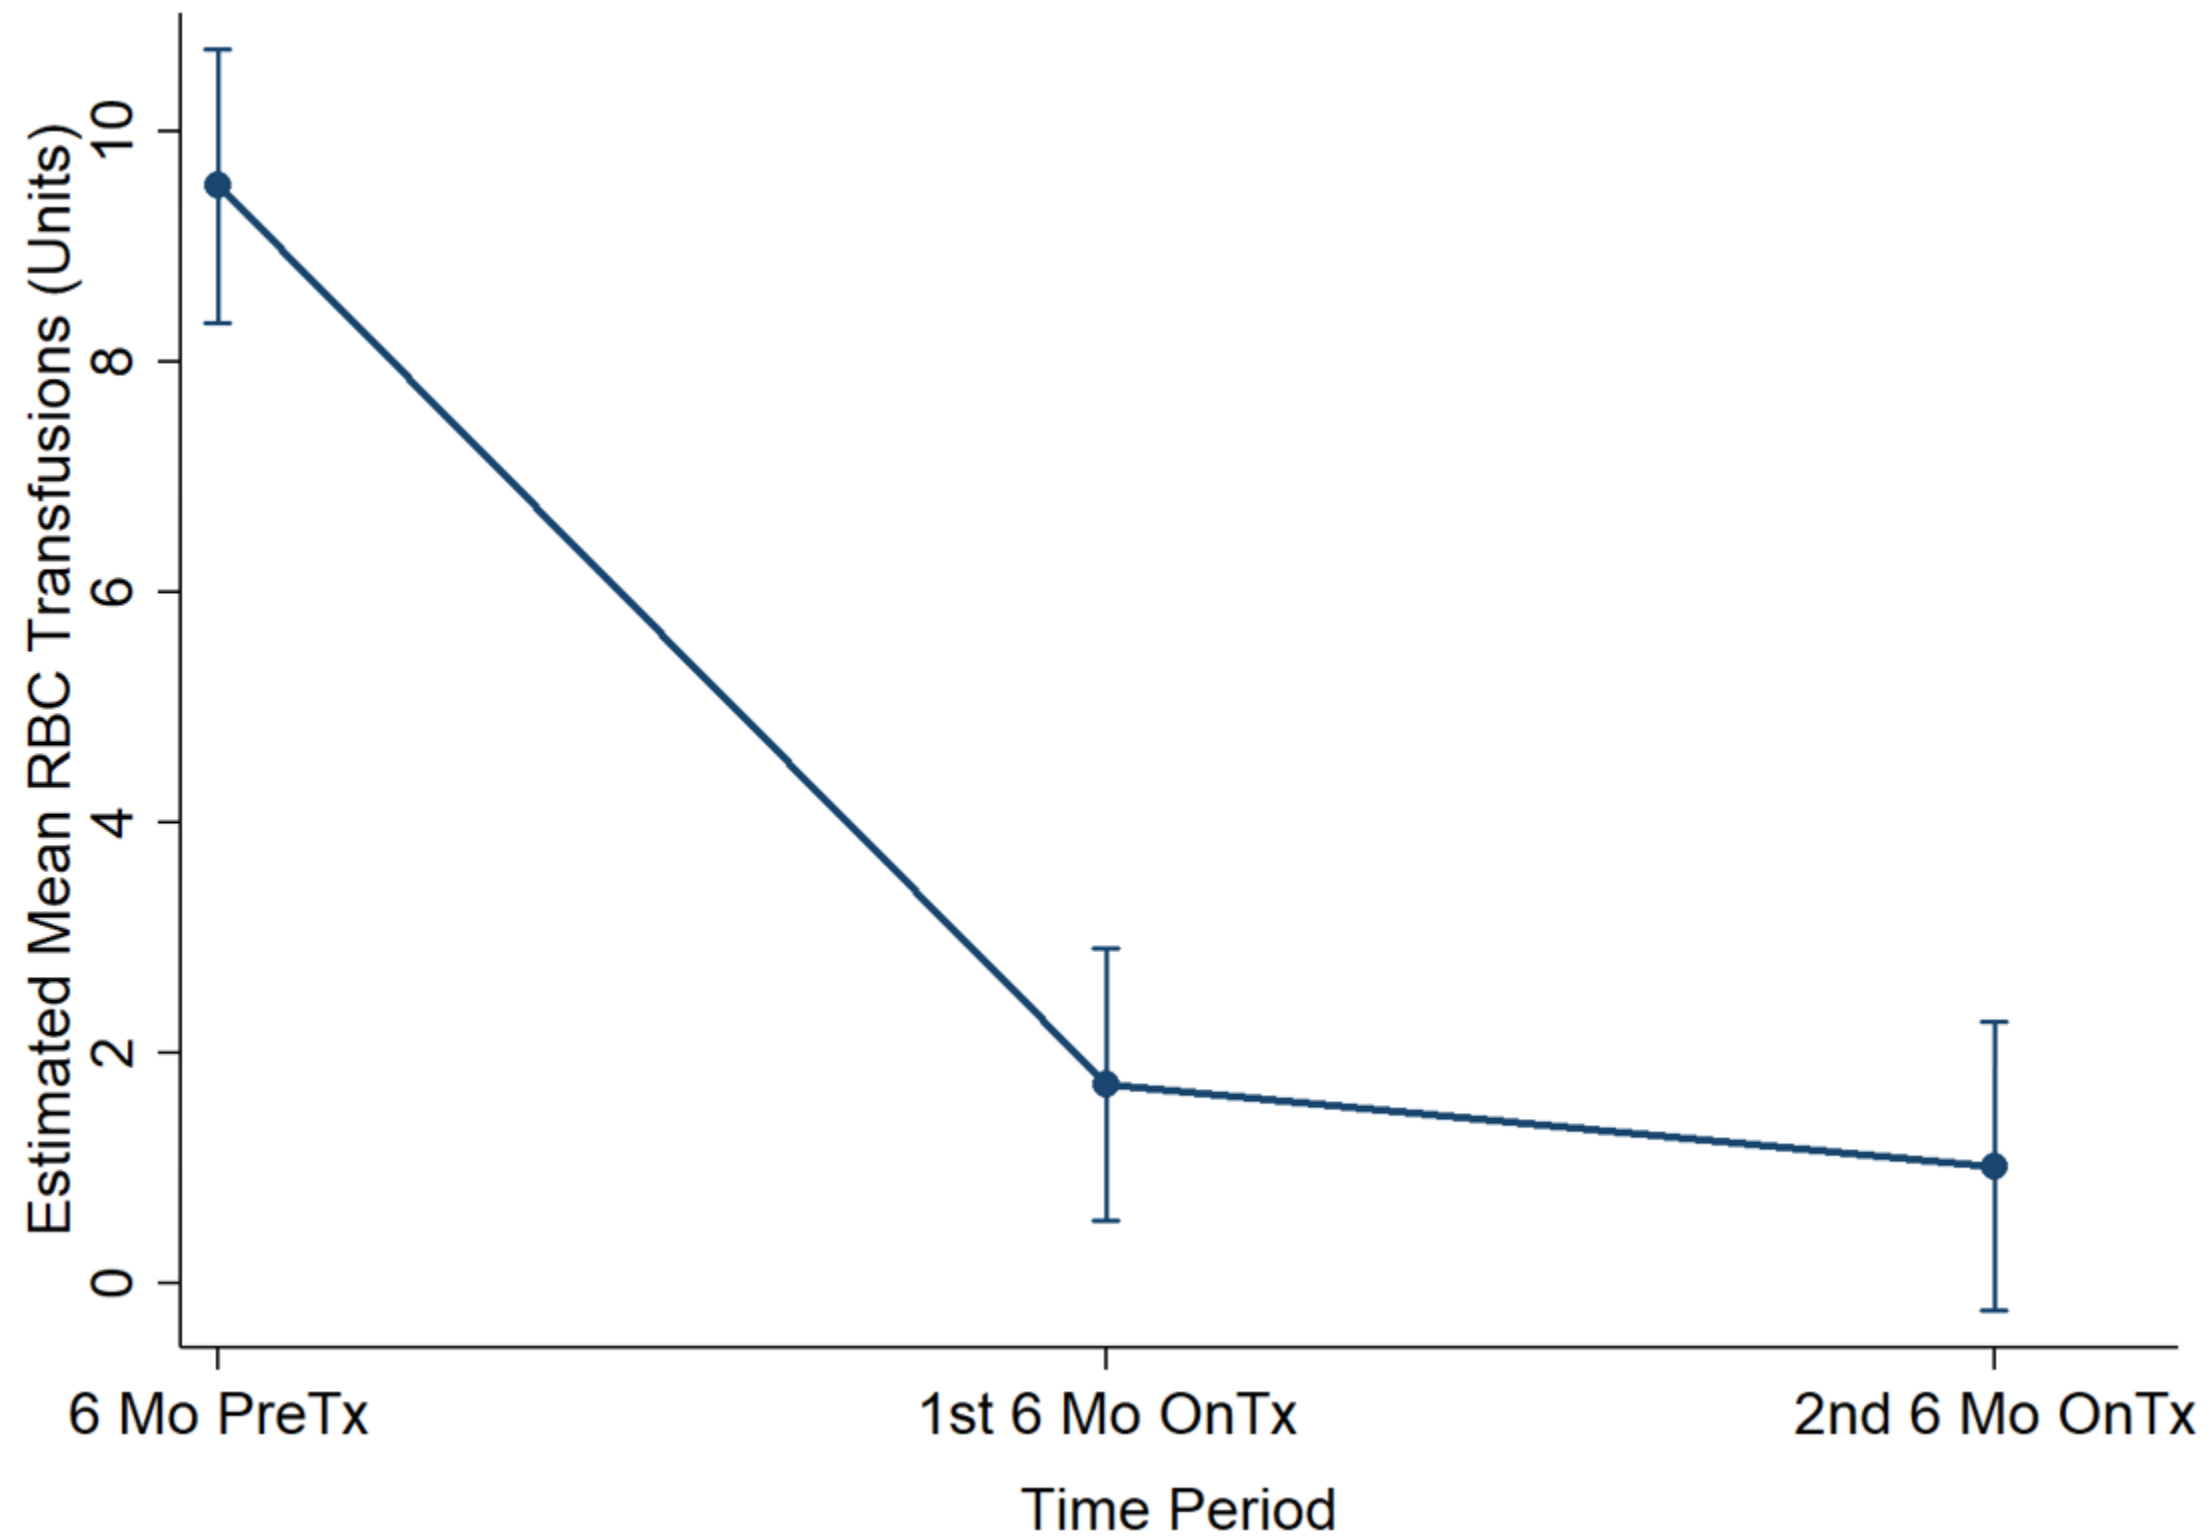

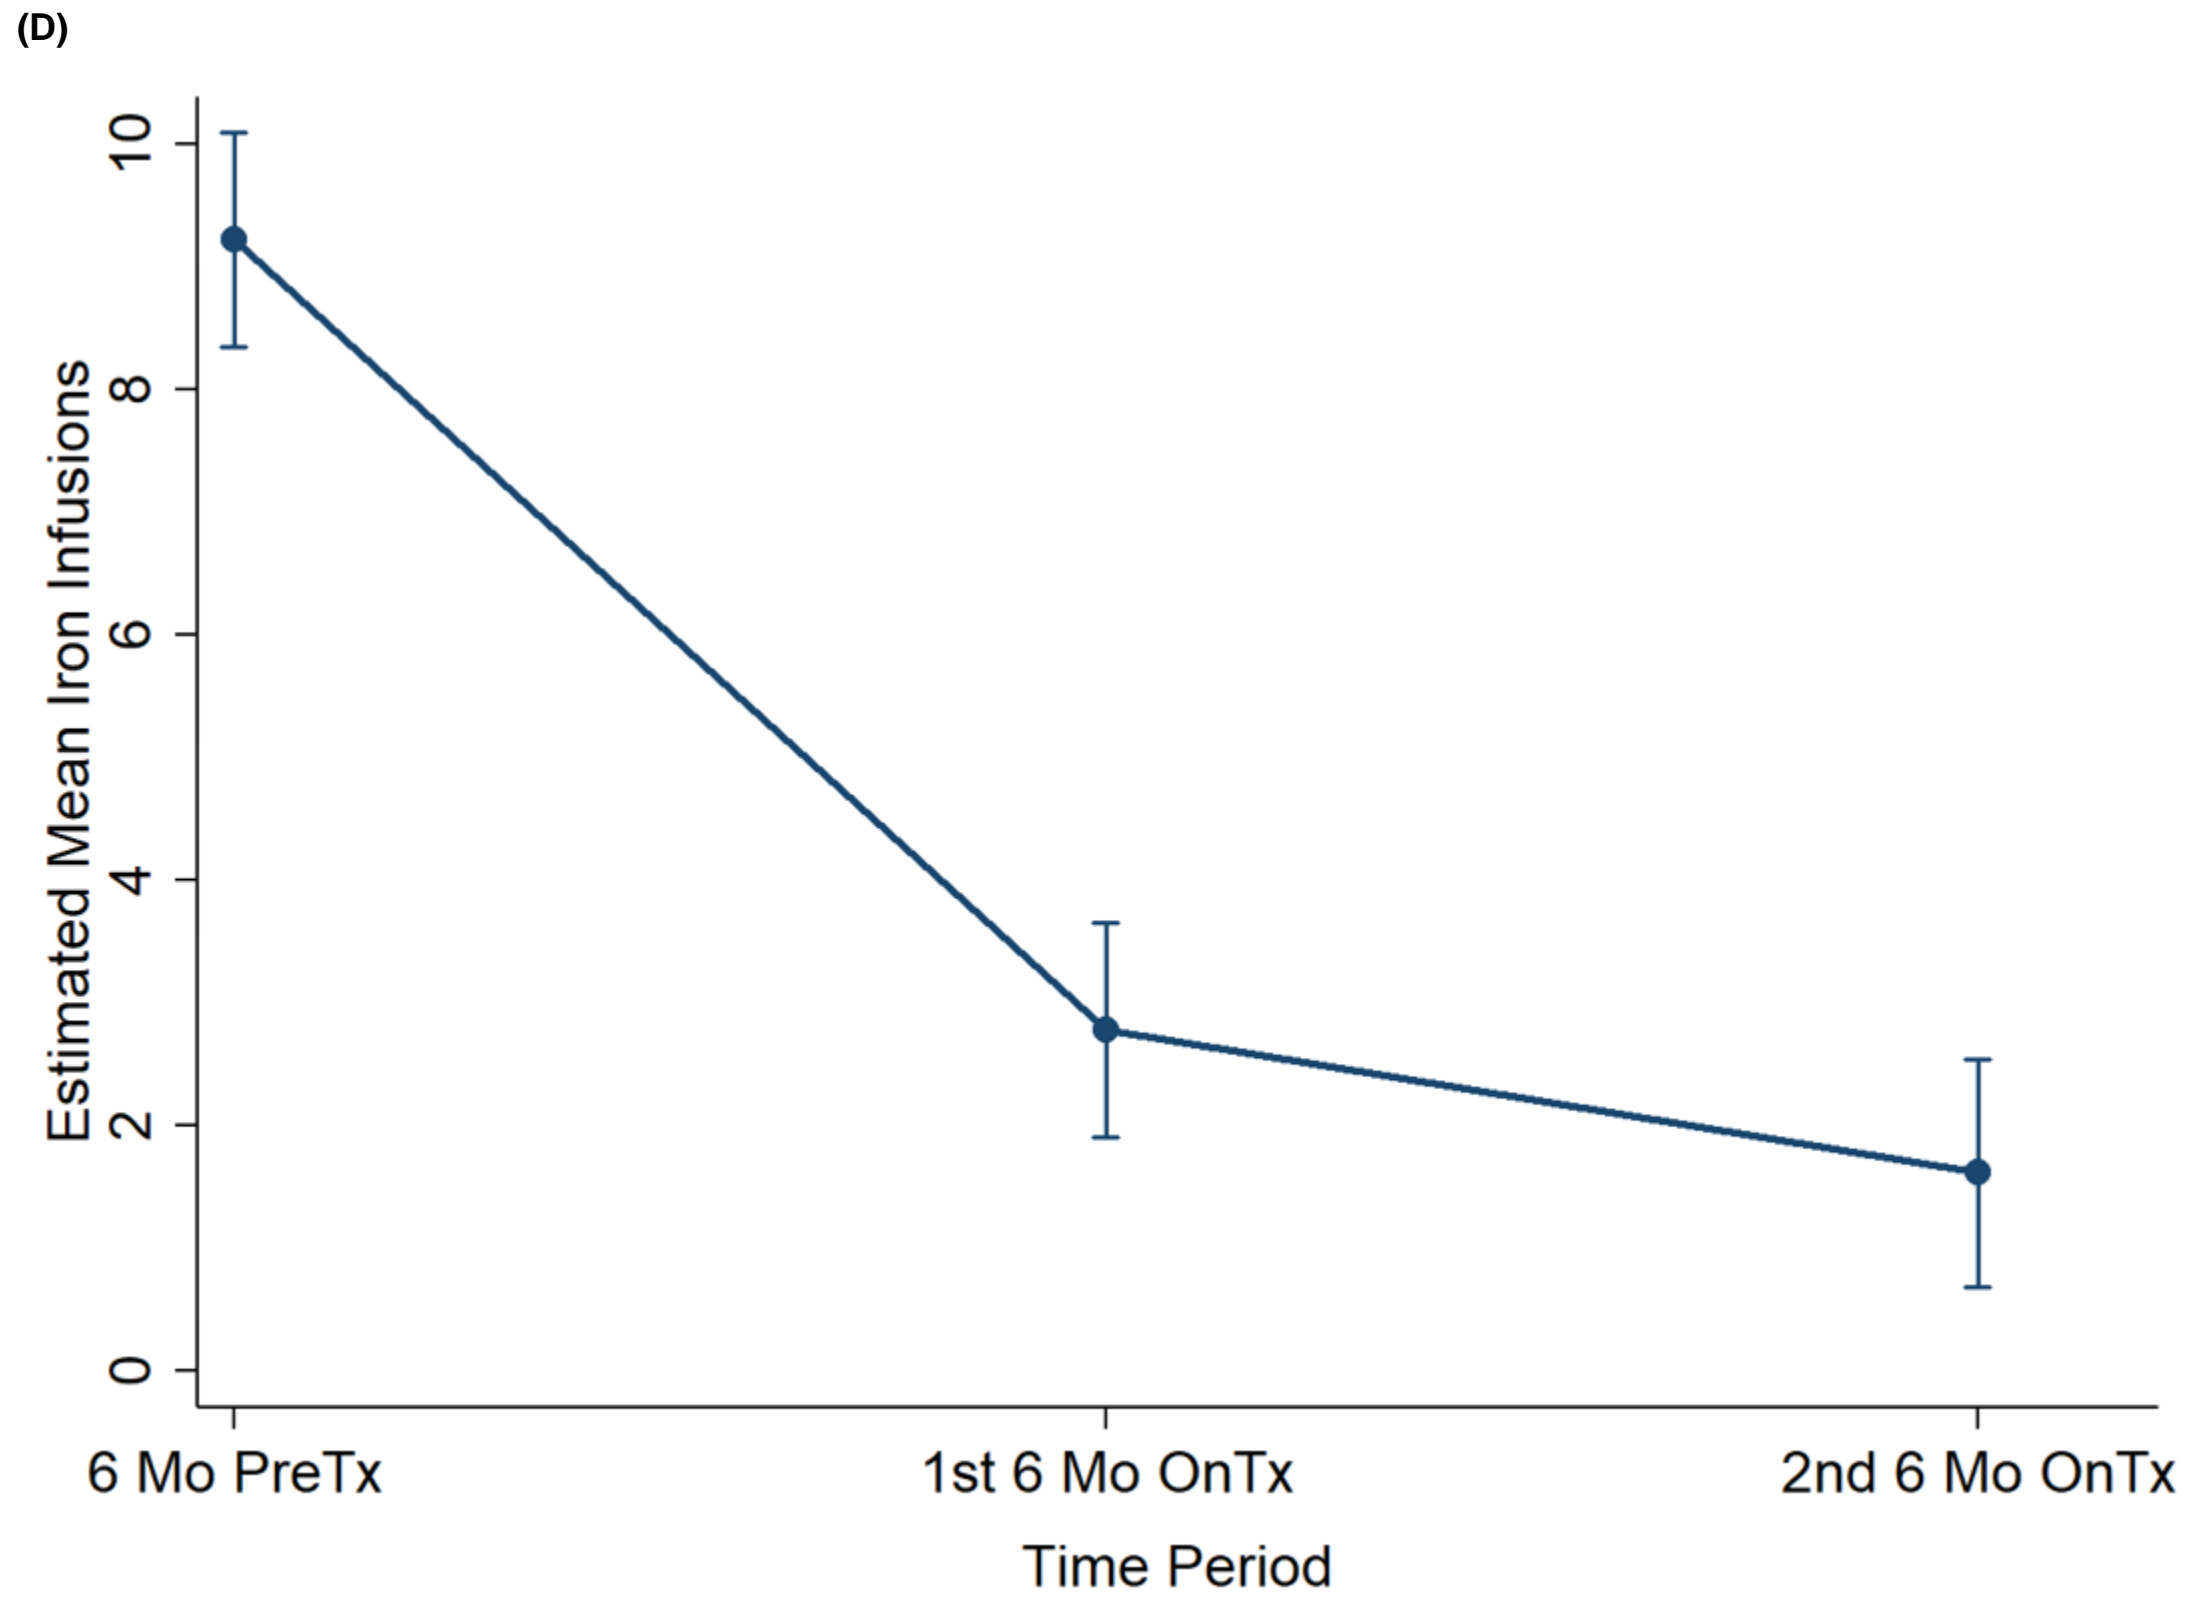

## Additional Information

13 of the 238 patients (5.4%) included in this study were previously comprehensively described in a prior case series.<sup>4</sup> An additional 34 patients (14.2%) had been partially described (epistaxis severity score data was described) in a prior case series, but data such as impact on hemoglobin and iron infusions were not described.<sup>5</sup>

## Supplemental References

1. Singh AK, Szczech L, Tang KL, et al. Correction of anemia with epoetin alfa in chronic kidney disease. *N Engl J Med*. 2006;355(20):2085-2098.
2. Hoag JB, Terry P, Mitchell S, Reh D, Merlo CA. An epistaxis severity score for hereditary hemorrhagic telangiectasia. *Laryngoscope*. 2010;120(4):838-843.
3. Yin LX, Reh DD, Hoag JB, et al. The minimal important difference of the epistaxis severity score in hereditary hemorrhagic telangiectasia. *Laryngoscope*. 2016;126(5):1029-1032.
4. Al-Samkari H, Kritharis A, Rodriguez-Lopez JM, Kuter DJ. Systemic bevacizumab for the treatment of chronic bleeding in hereditary haemorrhagic telangiectasia. *J Intern Med*. 2019;285(2):223-231.
5. Iyer VN, Apala DR, Pannu BS, et al. Intravenous Bevacizumab for Refractory Hereditary Hemorrhagic Telangiectasia-Related Epistaxis and Gastrointestinal Bleeding. *Mayo Clin Proc*. 2018;93(2):155-166.
